# Supplementary material for: Evaluation of Epigenetic Silencing of the miR-139-5p gene in the pathogenesis of colorectal cancer and its diagnostic biomarker capability in plasma samples
Source: Research Square preprint supplement (doi:10.21203/rs.3.rs-5527622/v1), 2025-04-10
Supplement: Supplementary file 1 [file 146e53910acddc800ba24274.docx]

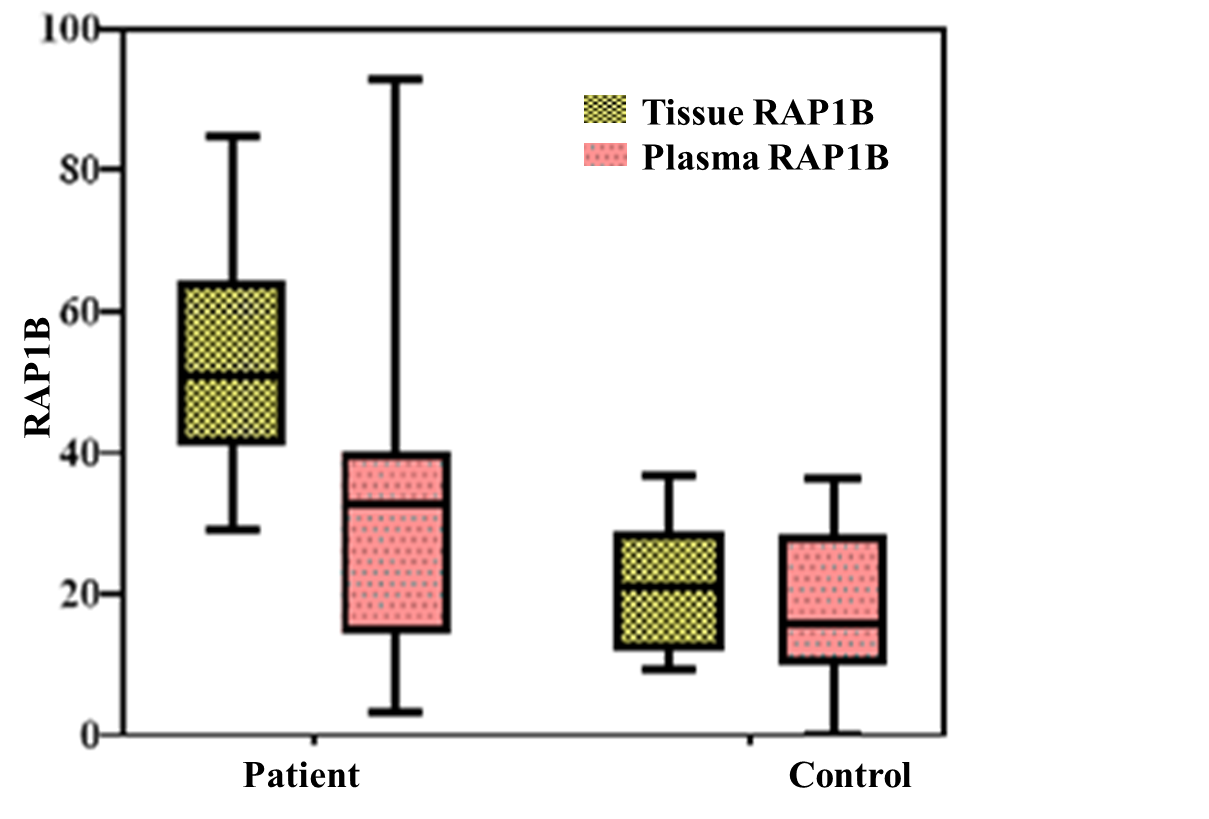


Supplementary Figure 1: Box plot of RAP-1b protein level in clinical samples.The median of RAP-1b concentration (ng/ml) for CRC patients were higher in plasma samples in comparison with those of control persons (32.67vs. 15.7, p=0.004) as well as in tissue specimens (51 vs. 21, p (<0. 001).
