# Supplementary material for: Evaluation of Epigenetic Silencing of the miR-139-5p gene in the pathogenesis of colorectal cancer and its diagnostic biomarker capability in plasma samples
Source: Research Square preprint supplement (doi:10.21203/rs.3.rs-5527622/v1), 2025-04-10
Supplement: Supplementary file 2 [file 3b62182af35e8e96d977e261.docx]

Supplementary table 2: Association between RAP-1b and clinicopathological factors in CRC affected patients

|  |  | Tissue RAP-1b |  |  | Plasma RAP-1b | P-value |
| --- | --- | --- | --- | --- | --- | --- |
| Clinicopathological characteristic | **No. of patients** | **Mean ± standard deviation** | **P-value** | **No. of patients** | **Mean ± standard deviation** |
| Tumor type |  | | | | |  |
| Adenocarcinoma | 10 | 53.26±14.96 | 0.917d | 21 | 32.23±23.46 | 0.594a |
| Mucinous | 5 | 52.30±19.74 | 9 | 33.71±19.31 |
| Histological grading |  | | | | |  |
| I | 7 | 45.50±11.92 | 0.168c | 12 | 29.19±9.97 | 0.317c |
| II | 7 | 58.37±17.95 | 16 | 37.73±27.74 |
| III | 1 | 67.00±. | 2 | 13.15±7.28 |
| Tumor location |  | | | | |  |
| Distal | 6 | 57.72±19.80 | 0.364d | 7 | 29.56±16.46 | 0.676d |
| Proximal | 9 | 49.75±13.18 | 23 | 33.63±23.64 |
| Tumor size |  | | | | |  |
| <50 mm | 11 | 51.61±17.57 | 0.614d | 19 | 33.57±23.61 | 0.899a |
|  | 4 | 56.57±11.79 | 11 | 31.13±19.83 |
| TNM Stage |  | | | | |  |
| I | 4 | 44.25±9.17 | 0.195c | 9 | 27.55±10.81 | 0.600b |
| II | 8 | 51.95±15.94 | 14 | 36.95±27.86 |
| III | 3 | 67.16±17.75 | 7 | 30.71±20.24 |
| Lymph node involvement |  | | | | |  |
| Yes | 3 | 67.16±17.75 | 0.216d | 7 | 30.71±20.24 | 1.00a |
| No | 12 | 49.38±14.11 | 23 | 33.27±22.87 |

*Standard deviation, a: Mann-Whitney U two-tailed tests; b: ANOVA; c: Kruskal-Wallis; d: Independent t - test
