# Supplementary material for: Evaluation of Epigenetic Silencing of the miR-139-5p gene in the pathogenesis of colorectal cancer and its diagnostic biomarker capability in plasma samples
Source: Research Square preprint supplement (doi:10.21203/rs.3.rs-5527622/v1), 2025-04-10
Supplement: Supplementary file 3 [file 5d2bd0efbcc958d2d75a0c58.docx]

Supplementary table 1: Association of miR-139-5p expression with clinical and pathological characteristics in plasma and tissues of CRC patients.

| Variable |  | miR-139-5P,ΔCT 2 ( - ΔΔCT )  Tissue | | | | |  | miR-139-5P,ΔCT 2 ( - ΔΔCT)  Plasma | | | | |
| --- | --- | --- | --- | --- | --- | --- | --- | --- | --- | --- | --- | --- |
|  | **number** | | **Mean** | **SD** | **Fold change** | **P. value** | **number** | | **Mean** | **SD** | **Fold change** | **P. value** |
| TNM Stage  I vs. II  II vs. III  III vs. I | 13  19  8 | | 5.51  7.16  6.54 | 3.21  3.52  2.44 | 3.13  0.65  0.49 | 0.376 | 13  19    8 | | 5.83  6.17  5.29 | 3.66  3.50  2.30 | 1.26  0.54  1.45 | 0.932 |
| Grade  I vs. II  II vs. III  III vs.I | 15  21  4 | | 5.87  7.34  4.27 | 2.87  3.50  1.72 | 2.77  0.11  3.03 | 0.162 | 15  21  4 | | 6.618  5.32  6.10 | 4.17  2.27  4.53 | 0.4  1.71  1.43 | 0.858 |
| Tumor type  Adenocarcinoma  Mucinous | 29  11 | | 5.519  6.85 | 3.13  3.67 | 2.51 | 0.028 | 29  11 | | 5.57  7.03 | 2.67  2.89 | 1.16 | 0.135 |
| Size  ≥50mm  <50mm | 19  21 | | 5.30  6.41 | 2.60  3.80 | 2.15 | 0.292 | 19  21 | | 5.76  6.17 | 3.01  2.52 | 0.71 | 0.649 |
| Lymphnode involvement  Yes  No | 8  32 | | 5.29  6.03 | 2.30  3.51 | 1.67 | 0.934 | 8  32 | | 7.42  5.61 | 1.58  2.86 | 2.42 | 0.27 |
| Location  Distala  Proximalb | 13  27 | | 6.11  5.77 | 3.17  3.40 | 0.79 | 0.765 | 13  27 | | 6.50  5.72 | 2.53  2.84 | 1.24 | 0.424 |
| a; Descending colon, sigmoid colon. b; Caecum, ascending colon, transverse colon | | | | | | | | | | | | |
